# Supplementary material for: Immunoinformatics and Molecular Docking Studies Predicted Potential Multiepitope‐Based Peptide Vaccine and Novel Compounds against Novel SARS‐CoV‐2 through Virtual Screening
Source: Hindawi journal article supplement (doi:10.1155/2021/1596834), 2021-01-01
Supplement: f2 [file 1596834.f2.pdf]

| Residue Number | Peptide Sequence | Predicted MHC Binding Affinity |
|----------------|------------------|--------------------------------|
| 174            | GTDLEGNFY        | 0.793                          |
| 201            | TVNVLAWLY        | 0.6255                         |
| 146            | GSVGFNIDY        | 0.3112                         |
| 110            | QTFSVLACY        | 0.2625                         |
| 153            | DYDCVSFCY        | 0.2097                         |
| 93             | TANPKTPKY        | 0.1676                         |
| 46             | SEDMLNPNY        | 0.1528                         |
| 286            | LLEDEFTPF        | 0.1132                         |

predicted by NETCTL 1.2 server  
threshold 0.75000

NetCTL-1.2 predictions using MHC supertype A1. Threshold 0.750000

174 ID 6lu7\_A pep GTDLEGNFY aff 0.7930 aff\_rescale 3.3669 cle 0.6229 tap 2  
201 ID 6lu7\_A pep TVNVLAWLY aff 0.6255 aff\_rescale 2.6559 cle 0.8852 tap  
146 ID 6lu7\_A pep GSVGFNIDY aff 0.3112 aff\_rescale 1.3211 cle 0.9565 tap 2.  
110 ID 6lu7\_A pep QTFSVLACY aff 0.2625 aff\_rescale 1.1146 cle 0.9725 tap 2  
153 ID 6lu7\_A pep DYDCVSFCY aff 0.2097 aff\_rescale 0.8905 cle 0.9722 tap 2  
93 ID 6lu7\_A pep TANPKTPKY aff 0.1676 aff\_rescale 0.7118 cle 0.9755 tap 2.  
46 ID 6lu7\_A pep SEDMLNPNY aff 0.1528 aff\_rescale 0.6489 cle 0.8406 tap 2  
286 ID 6lu7\_A pep LLEDEFTPF aff 0.1132 aff\_rescale 0.4807 cle 0.9503 tap 2.  
261 ID 6lu7\_A pep VLDMCASLK aff 0.1397 aff\_rescale 0.5933 cle 0.7881 tap (C  
231 ID 6lu7\_A pep NLVAMKYNY aff 0.1073 aff\_rescale 0.4555 cle 0.8757 tap  
118 ID 6lu7\_A pep YNGSPSGVY aff 0.0999 aff\_rescale 0.4243 cle 0.9564 tap 2  
256 ID 6lu7\_A pep QTGIAVLDM aff 0.1269 aff\_rescale 0.5388 cle 0.9157 tap (C  
23 ID 6lu7\_A pep GTTTLNGLW aff 0.1311 aff\_rescale 0.5566 cle 0.4256 tap 0  
253 ID 6lu7\_A pep LSAQTGIAV aff 0.1426 aff\_rescale 0.6054 cle 0.0941 tap 0.  
24 ID 6lu7\_A pep TTTLNGLWL aff 0.1293 aff\_rescale 0.5489 cle 0.2161 tap 0.  
225 ID 6lu7\_A pep TTLNDFNLV aff 0.1106 aff\_rescale 0.4694 cle 0.9195 tap 0  
81 ID 6lu7\_A pep SMQNCVLKL aff 0.0952 aff\_rescale 0.4042 cle 0.9581 tap 1  
157 ID 6lu7\_A pep VSFCYMHHM aff 0.0996 aff\_rescale 0.4230 cle 0.9507 tap  
195 ID 6lu7\_A pep GTDTTITVN aff 0.1527 aff\_rescale 0.6485 cle 0.0525 tap -1.  
229 ID 6lu7\_A pep DFNLVAMKY aff 0.0669 aff\_rescale 0.2841 cle 0.9722 tap  
242 ID 6lu7\_A pep LTQDHVDIL aff 0.1109 aff\_rescale 0.4711 cle 0.3794 tap 0.  
219 ID 6lu7\_A pep FLNRFTTTL aff 0.0917 aff\_rescale 0.3893 cle 0.9334 tap 0.  
29 ID 6lu7\_A pep GLWLDDVVY aff 0.0620 aff\_rescale 0.2632 cle 0.9766 tap 0.  
185 ID 6lu7\_A pep FVDRQTAQA aff 0.1082 aff\_rescale 0.4593 cle 0.7828 tap -1  
151 ID 6lu7\_A pep NIDYDCVSF aff 0.0733 aff\_rescale 0.3111 cle 0.6732 tap 2.  
279 ID 6lu7\_A pep RTILGSALL aff 0.0762 aff\_rescale 0.3234 cle 0.9504 tap 1.  
283 ID 6lu7\_A pep GSALLEDEF aff 0.0921 aff\_rescale 0.3911 cle 0.0575 tap 2.  
297 ID 6lu7\_A pep VRQCSGVTF aff 0.0554 aff\_rescale 0.2353 cle 0.9711 tap 2  
80 ID 6lu7\_A pep HSMQNCVLK aff 0.0917 aff\_rescale 0.3893 cle 0.6203 tap (C  
19 ID 6lu7\_A pep QVTCGTTTL aff 0.0704 aff\_rescale 0.2990 cle 0.9775 tap 1.

|     |    |        |     |           |     |        |             |        |     |        |     |     |
|-----|----|--------|-----|-----------|-----|--------|-------------|--------|-----|--------|-----|-----|
| 254 | ID | 6lu7_A | pep | SAQTGIAVL | aff | 0.0701 | aff_rescale | 0.2975 | cle | 0.9645 | tap | 1.  |
| 104 | ID | 6lu7_A | pep | VRIQPGQTF | aff | 0.0531 | aff_rescale | 0.2253 | cle | 0.8613 | tap | 2.  |
| 197 | ID | 6lu7_A | pep | DTTITVNVL | aff | 0.0792 | aff_rescale | 0.3362 | cle | 0.8423 | tap | 0.  |
| 49  | ID | 6lu7_A | pep | MLNPNYEDL | aff | 0.0737 | aff_rescale | 0.3130 | cle | 0.9214 | tap | 0   |
| 5   | ID | 6lu7_A | pep | KMAFPSGKV | aff | 0.0729 | aff_rescale | 0.3094 | cle | 0.9651 | tap | 0.  |
| 69  | ID | 6lu7_A | pep | QAGNVQLRV | aff | 0.0915 | aff_rescale | 0.3886 | cle | 0.5614 | tap | (   |
| 223 | ID | 6lu7_A | pep | FTTTLNDFN | aff | 0.1278 | aff_rescale | 0.5426 | cle | 0.0225 | tap | -1  |
| 60  | ID | 6lu7_A | pep | RKSNHNFLV | aff | 0.0798 | aff_rescale | 0.3386 | cle | 0.7271 | tap | 0.  |
| 67  | ID | 6lu7_A | pep | LVQAGNVQL | aff | 0.0676 | aff_rescale | 0.2870 | cle | 0.9057 | tap | C   |
| 142 | ID | 6lu7_A | pep | NGSCGSVGF | aff | 0.0518 | aff_rescale | 0.2201 | cle | 0.8785 | tap | 2   |
| 209 | ID | 6lu7_A | pep | YAAVINGDR | aff | 0.0880 | aff_rescale | 0.3735 | cle | 0.0818 | tap | 1   |
| 222 | ID | 6lu7_A | pep | RFTTTLNDF | aff | 0.0538 | aff_rescale | 0.2283 | cle | 0.5532 | tap | 3.  |
| 44  | ID | 6lu7_A | pep | CTSEDMLNP | aff | 0.1073 | aff_rescale | 0.4555 | cle | 0.0243 | tap | 0.  |
| 226 | ID | 6lu7_A | pep | TLNDFNLVA | aff | 0.0921 | aff_rescale | 0.3910 | cle | 0.6700 | tap | -(  |
| 164 | ID | 6lu7_A | pep | HMELPTGVH | aff | 0.0871 | aff_rescale | 0.3697 | cle | 0.8244 | tap | -(  |
| 224 | ID | 6lu7_A | pep | TTTLNDFNL | aff | 0.0908 | aff_rescale | 0.3855 | cle | 0.2364 | tap | 0.  |
| 260 | ID | 6lu7_A | pep | AVLDMCASL | aff | 0.0588 | aff_rescale | 0.2496 | cle | 0.9666 | tap | :   |
| 200 | ID | 6lu7_A | pep | ITVNVLAWL | aff | 0.0672 | aff_rescale | 0.2851 | cle | 0.7940 | tap | 1   |
| 128 | ID | 6lu7_A | pep | CAMRPNFTI | aff | 0.0687 | aff_rescale | 0.2918 | cle | 0.9030 | tap | 0.  |
| 215 | ID | 6lu7_A | pep | GDRWFLNRF | aff | 0.0490 | aff_rescale | 0.2080 | cle | 0.8800 | tap | :   |
| 177 | ID | 6lu7_A | pep | LEGNFYGPF | aff | 0.0617 | aff_rescale | 0.2619 | cle | 0.5531 | tap | 2.  |
| 95  | ID | 6lu7_A | pep | NPKTPKYKF | aff | 0.0434 | aff_rescale | 0.1845 | cle | 0.9601 | tap | 2.  |
| 180 | ID | 6lu7_A | pep | NFYGPFVDR | aff | 0.0496 | aff_rescale | 0.2105 | cle | 0.9661 | tap | 1   |
| 97  | ID | 6lu7_A | pep | KTPKYKFVR | aff | 0.0676 | aff_rescale | 0.2868 | cle | 0.5741 | tap | 1.  |
| 58  | ID | 6lu7_A | pep | LIRKSNHNF | aff | 0.0641 | aff_rescale | 0.2724 | cle | 0.2109 | tap | 2.7 |
| 129 | ID | 6lu7_A | pep | AMRPNFTIK | aff | 0.0602 | aff_rescale | 0.2557 | cle | 0.9625 | tap | 0.  |
| 140 | ID | 6lu7_A | pep | FLNGSCGSV | aff | 0.0719 | aff_rescale | 0.3052 | cle | 0.7902 | tap | 0   |
| 106 | ID | 6lu7_A | pep | IQPGQTFSV | aff | 0.0609 | aff_rescale | 0.2586 | cle | 0.9756 | tap | 0.: |
| 126 | ID | 6lu7_A | pep | YQCAMRPNF | aff | 0.0684 | aff_rescale | 0.2903 | cle | 0.0536 | tap | :   |
| 12  | ID | 6lu7_A | pep | KVEGCMVQV | aff | 0.0775 | aff_rescale | 0.3290 | cle | 0.5447 | tap | (   |
| 239 | ID | 6lu7_A | pep | YEPLTQDHV | aff | 0.0695 | aff_rescale | 0.2953 | cle | 0.7922 | tap | C   |
| 211 | ID | 6lu7_A | pep | AVINGDRWF | aff | 0.0593 | aff_rescale | 0.2518 | cle | 0.1557 | tap | :   |
| 205 | ID | 6lu7_A | pep | LAWLYAAVI | aff | 0.0603 | aff_rescale | 0.2559 | cle | 0.8650 | tap | C   |
| 194 | ID | 6lu7_A | pep | AGTDTTITV | aff | 0.0643 | aff_rescale | 0.2730 | cle | 0.8827 | tap | 0.  |
| 204 | ID | 6lu7_A | pep | VLAWLYAAV | aff | 0.0794 | aff_rescale | 0.3369 | cle | 0.3587 | tap |     |
| 234 | ID | 6lu7_A | pep | AMKYNYEPL | aff | 0.0542 | aff_rescale | 0.2302 | cle | 0.8302 | tap |     |
| 132 | ID | 6lu7_A | pep | PNFTIKGSF | aff | 0.0483 | aff_rescale | 0.2051 | cle | 0.6862 | tap | 2.1 |
| 192 | ID | 6lu7_A | pep | QAAGTDTTI | aff | 0.0771 | aff_rescale | 0.3272 | cle | 0.3248 | tap | 0.  |
| 290 | ID | 6lu7_A | pep | EFTPFDVVR | aff | 0.0479 | aff_rescale | 0.2035 | cle | 0.9544 | tap | 1.  |
| 59  | ID | 6lu7_A | pep | IRKSNHNFL | aff | 0.0493 | aff_rescale | 0.2093 | cle | 0.9245 | tap | 1.2 |
| 92  | ID | 6lu7_A | pep | DTANPKTPK | aff | 0.0689 | aff_rescale | 0.2925 | cle | 0.6897 | tap | 0.  |
| 35  | ID | 6lu7_A | pep | VVYCPRHVI | aff | 0.0524 | aff_rescale | 0.2226 | cle | 0.9571 | tap | 0.  |
| 198 | ID | 6lu7_A | pep | TTITVNVLA | aff | 0.1007 | aff_rescale | 0.4275 | cle | 0.0571 | tap | -0. |
| 274 | ID | 6lu7_A | pep | NGMNGRTIL | aff | 0.0556 | aff_rescale | 0.2359 | cle | 0.8713 | tap | 0   |

278 ID 6lu7\_A pep GRTILGSAL aff 0.0483 aff\_rescale 0.2050 cle 0.9609 tap 1.  
74 ID 6lu7\_A pep QLRVIGHSM aff 0.0581 aff\_rescale 0.2467 cle 0.8998 tap 0.  
212 ID 6lu7\_A pep VINGDRWFL aff 0.0656 aff\_rescale 0.2784 cle 0.4296 tap 1  
163 ID 6lu7\_A pep HHMELPTGV aff 0.0588 aff\_rescale 0.2498 cle 0.8911 tap (   
107 ID 6lu7\_A pep QPGQTFSVL aff 0.0536 aff\_rescale 0.2275 cle 0.9780 tap 0.  
31 ID 6lu7\_A pep WLDDVVYCP aff 0.0903 aff\_rescale 0.3832 cle 0.1133 tap -(  
159 ID 6lu7\_A pep FCYMHMEL aff 0.0648 aff\_rescale 0.2752 cle 0.3944 tap  
245 ID 6lu7\_A pep DHVDILGPL aff 0.0491 aff\_rescale 0.2084 cle 0.9561 tap 0.  
199 ID 6lu7\_A pep TITVNVLAW aff 0.0647 aff\_rescale 0.2748 cle 0.4084 tap 0  
133 ID 6lu7\_A pep NFTIKGSFL aff 0.0473 aff\_rescale 0.2007 cle 0.8908 tap 0.9  
263 ID 6lu7\_A pep DMCASLKEL aff 0.0637 aff\_rescale 0.2706 cle 0.4633 tap (   
42 ID 6lu7\_A pep VICTSEDML aff 0.0696 aff\_rescale 0.2953 cle 0.1856 tap 1.  
79 ID 6lu7\_A pep GHSMQNCVL aff 0.0483 aff\_rescale 0.2051 cle 0.8993 tap (   
41 ID 6lu7\_A pep HVICTSEDM aff 0.0688 aff\_rescale 0.2920 cle 0.3478 tap 0.  
271 ID 6lu7\_A pep LLQNGMNGR aff 0.0630 aff\_rescale 0.2676 cle 0.2531 tap  
264 ID 6lu7\_A pep MCASLKELL aff 0.0712 aff\_rescale 0.3023 cle 0.1443 tap 0  
214 ID 6lu7\_A pep NGDRWFLNR aff 0.0653 aff\_rescale 0.2772 cle 0.2389 tap  
53 ID 6lu7\_A pep NYEDLLIRK aff 0.0555 aff\_rescale 0.2355 cle 0.7029 tap 0.4  
68 ID 6lu7\_A pep VQAGNVQLR aff 0.0605 aff\_rescale 0.2568 cle 0.1444 tap 1  
295 ID 6lu7\_A pep DVVRQCSGV aff 0.0587 aff\_rescale 0.2491 cle 0.7132 tap (   
50 ID 6lu7\_A pep LNPNYEDLL aff 0.0608 aff\_rescale 0.2581 cle 0.4079 tap 0.  
241 ID 6lu7\_A pep PLTQDHVDI aff 0.0528 aff\_rescale 0.2242 cle 0.9424 tap -0.  
98 ID 6lu7\_A pep TPKYKFVRI aff 0.0469 aff\_rescale 0.1993 cle 0.9573 tap 0.3  
289 ID 6lu7\_A pep DEFTPFVVDV aff 0.0532 aff\_rescale 0.2258 cle 0.9453 tap -0  
251 ID 6lu7\_A pep GPLSAQTGI aff 0.0522 aff\_rescale 0.2218 cle 0.8450 tap 0.  
196 ID 6lu7\_A pep TDTTITVNV aff 0.0584 aff\_rescale 0.2481 cle 0.7282 tap -0.  
246 ID 6lu7\_A pep HVDILGPLS aff 0.1113 aff\_rescale 0.4726 cle 0.0349 tap -2.  
210 ID 6lu7\_A pep AAVINGDRW aff 0.0539 aff\_rescale 0.2287 cle 0.4492 tap  
114 ID 6lu7\_A pep VLACYNGSP aff 0.0783 aff\_rescale 0.3323 cle 0.0333 tap (   
169 ID 6lu7\_A pep TGVHAGTDL aff 0.0506 aff\_rescale 0.2147 cle 0.6985 tap (   
165 ID 6lu7\_A pep MELPTGVHA aff 0.0570 aff\_rescale 0.2421 cle 0.9187 tap -(  
130 ID 6lu7\_A pep MRPNFTIKG aff 0.0668 aff\_rescale 0.2837 cle 0.7644 tap -1  
173 ID 6lu7\_A pep AGTDLEGNF aff 0.0482 aff\_rescale 0.2048 cle 0.1675 tap 2  
156 ID 6lu7\_A pep CVSFCYMHH aff 0.0842 aff\_rescale 0.3577 cle 0.1177 tap -  
117 ID 6lu7\_A pep CYNGSPSGV aff 0.0510 aff\_rescale 0.2167 cle 0.6599 tap 0  
228 ID 6lu7\_A pep NDFNLVAMK aff 0.0550 aff\_rescale 0.2333 cle 0.6255 tap  
233 ID 6lu7\_A pep VAMKYNYEP aff 0.0750 aff\_rescale 0.3185 cle 0.0416 tap  
227 ID 6lu7\_A pep LNDFNLVAM aff 0.0594 aff\_rescale 0.2523 cle 0.5904 tap -  
61 ID 6lu7\_A pep KSNHNFLVQ aff 0.0765 aff\_rescale 0.3246 cle 0.0573 tap 0  
83 ID 6lu7\_A pep QNCVLKLV aff 0.0627 aff\_rescale 0.2664 cle 0.3735 tap 0  
268 ID 6lu7\_A pep LKELLQNGM aff 0.0548 aff\_rescale 0.2326 cle 0.5735 tap (   
265 ID 6lu7\_A pep CASLKELLQ aff 0.0777 aff\_rescale 0.3301 cle 0.0293 tap -0  
65 ID 6lu7\_A pep NFLVQAGNV aff 0.0555 aff\_rescale 0.2358 cle 0.4617 tap 0  
90 ID 6lu7\_A pep KVDTANPKT aff 0.0834 aff\_rescale 0.3542 cle 0.0364 tap -0

52 ID 6lu7\_A pep PNYEDLLIR aff 0.0479 aff\_rescale 0.2035 cle 0.4507 tap 1.1  
22 ID 6lu7\_A pep CGTTTLNGL aff 0.0548 aff\_rescale 0.2327 cle 0.4402 tap 0.  
161 ID 6lu7\_A pep YMHHMELPT aff 0.0826 aff\_rescale 0.3506 cle 0.0297 tap -  
82 ID 6lu7\_A pep MQNCVLKLK aff 0.0631 aff\_rescale 0.2677 cle 0.1853 tap (C  
89 ID 6lu7\_A pep LKVDTANPK aff 0.0559 aff\_rescale 0.2371 cle 0.3105 tap 0  
94 ID 6lu7\_A pep ANPKTPKYK aff 0.0517 aff\_rescale 0.2197 cle 0.4933 tap 0  
189 ID 6lu7\_A pep QTAQAAGTD aff 0.0925 aff\_rescale 0.3928 cle 0.0233 tap -  
4 ID 6lu7\_A pep RKMAFPSGK aff 0.0597 aff\_rescale 0.2533 cle 0.1516 tap 0.  
122 ID 6lu7\_A pep PSGVYQCAM aff 0.0703 aff\_rescale 0.2986 cle 0.1694 tap -  
121 ID 6lu7\_A pep SPSGVYQCA aff 0.0519 aff\_rescale 0.2204 cle 0.8655 tap -(C  
20 ID 6lu7\_A pep VTCGTTTLN aff 0.0842 aff\_rescale 0.3575 cle 0.1114 tap -1.  
154 ID 6lu7\_A pep YDCVSFCYM aff 0.0640 aff\_rescale 0.2717 cle 0.2884 tap -  
144 ID 6lu7\_A pep SCGSVGFNI aff 0.0626 aff\_rescale 0.2656 cle 0.1383 tap 0.  
32 ID 6lu7\_A pep LDDVVYCPR aff 0.0548 aff\_rescale 0.2325 cle 0.1237 tap 0  
134 ID 6lu7\_A pep FTIKGSFLN aff 0.0829 aff\_rescale 0.3522 cle 0.0460 tap -1.  
51 ID 6lu7\_A pep NPNYEDLLI aff 0.0560 aff\_rescale 0.2377 cle 0.3186 tap 0.2  
291 ID 6lu7\_A pep FTPFDVVRQ aff 0.0687 aff\_rescale 0.2917 cle 0.1581 tap -0  
183 ID 6lu7\_A pep GPFVDRQTA aff 0.0468 aff\_rescale 0.1986 cle 0.9554 tap -(C  
62 ID 6lu7\_A pep SNHNFLVQA aff 0.0606 aff\_rescale 0.2573 cle 0.4079 tap -0  
10 ID 6lu7\_A pep SGKVEGCMV aff 0.0541 aff\_rescale 0.2297 cle 0.4221 tap -(C  
298 ID 6lu7\_A pep RQCSGVTFQ aff 0.0615 aff\_rescale 0.2610 cle 0.1047 tap 0  
75 ID 6lu7\_A pep LRVIGHSMQ aff 0.0490 aff\_rescale 0.2081 cle 0.4968 tap 0.  
123 ID 6lu7\_A pep SGVYQCAMR aff 0.0498 aff\_rescale 0.2115 cle 0.0690 tap  
66 ID 6lu7\_A pep FLVQAGNVQ aff 0.0643 aff\_rescale 0.2728 cle 0.0472 tap 0  
34 ID 6lu7\_A pep DVVYCPRHV aff 0.0522 aff\_rescale 0.2217 cle 0.3717 tap 0  
27 ID 6lu7\_A pep LNGLWLDDV aff 0.0594 aff\_rescale 0.2522 cle 0.1852 tap (C  
252 ID 6lu7\_A pep PLSAQTGIA aff 0.0627 aff\_rescale 0.2664 cle 0.4012 tap -1.  
285 ID 6lu7\_A pep ALLEDEFTP aff 0.0586 aff\_rescale 0.2490 cle 0.0566 tap 0.  
45 ID 6lu7\_A pep TSEDMLNPN aff 0.0803 aff\_rescale 0.3411 cle 0.0282 tap -1  
124 ID 6lu7\_A pep GVYQCAMRP aff 0.0594 aff\_rescale 0.2523 cle 0.0355 tap  
96 ID 6lu7\_A pep PKTPKYKFFV aff 0.0438 aff\_rescale 0.1859 cle 0.5762 tap -0.  
167 ID 6lu7\_A pep LPTGVHAGT aff 0.0513 aff\_rescale 0.2177 cle 0.7573 tap -1  
203 ID 6lu7\_A pep NVLAWLYAA aff 0.0616 aff\_rescale 0.2617 cle 0.1526 tap -  
86 ID 6lu7\_A pep VLKLVKVDTA aff 0.0554 aff\_rescale 0.2350 cle 0.3815 tap -0  
120 ID 6lu7\_A pep GSPSGVYQC aff 0.0568 aff\_rescale 0.2414 cle 0.1800 tap 0  
288 ID 6lu7\_A pep EDEFTPFDV aff 0.0513 aff\_rescale 0.2176 cle 0.4200 tap -0.  
17 ID 6lu7\_A pep MVQVTCGTT aff 0.0672 aff\_rescale 0.2853 cle 0.0501 tap -(C  
28 ID 6lu7\_A pep NGLWLDDVV aff 0.0566 aff\_rescale 0.2401 cle 0.0923 tap (C  
25 ID 6lu7\_A pep TTLNGLWLD aff 0.0816 aff\_rescale 0.3465 cle 0.0297 tap -1  
78 ID 6lu7\_A pep IGHSMQNCV aff 0.0535 aff\_rescale 0.2273 cle 0.1435 tap 0  
176 ID 6lu7\_A pep DLEGNFYGP aff 0.0589 aff\_rescale 0.2503 cle 0.1471 tap -(C  
236 ID 6lu7\_A pep KYNYEPLTQ aff 0.0463 aff\_rescale 0.1968 cle 0.3186 tap C  
149 ID 6lu7\_A pep GFNIDYDCV aff 0.0451 aff\_rescale 0.1915 cle 0.3232 tap 0  
16 ID 6lu7\_A pep CMVQVTCGT aff 0.0649 aff\_rescale 0.2754 cle 0.0334 tap -(C

218 ID 6lu7\_A pep WFLNRFTTT aff 0.0564 aff\_rescale 0.2394 cle 0.2177 tap -0  
70 ID 6lu7\_A pep AGNVQLRVI aff 0.0493 aff\_rescale 0.2094 cle 0.1847 tap 0.  
243 ID 6lu7\_A pep TQDHVDILG aff 0.0739 aff\_rescale 0.3136 cle 0.0647 tap -1  
191 ID 6lu7\_A pep AQAAGTDTT aff 0.0633 aff\_rescale 0.2689 cle 0.0237 tap -1  
235 ID 6lu7\_A pep MKYNYEPLT aff 0.0600 aff\_rescale 0.2546 cle 0.0470 tap -1  
273 ID 6lu7\_A pep QNGMNGRTI aff 0.0523 aff\_rescale 0.2221 cle 0.0767 tap (0  
277 ID 6lu7\_A pep NGRTILGSA aff 0.0527 aff\_rescale 0.2239 cle 0.3810 tap -0.  
258 ID 6lu7\_A pep GIAVLDMCA aff 0.0580 aff\_rescale 0.2462 cle 0.1917 tap -1  
181 ID 6lu7\_A pep FYGPFVDRQ aff 0.0550 aff\_rescale 0.2337 cle 0.0743 tap 0  
160 ID 6lu7\_A pep CYMHMELP aff 0.0538 aff\_rescale 0.2286 cle 0.0262 tap  
77 ID 6lu7\_A pep VIGHSMQNC aff 0.0552 aff\_rescale 0.2342 cle 0.0228 tap 0  
178 ID 6lu7\_A pep EGNFYGPFV aff 0.0520 aff\_rescale 0.2208 cle 0.2363 tap -0  
18 ID 6lu7\_A pep VQVTCGTTT aff 0.0615 aff\_rescale 0.2611 cle 0.0462 tap -0  
190 ID 6lu7\_A pep TAQAAGTDT aff 0.0656 aff\_rescale 0.2786 cle 0.0243 tap -1  
108 ID 6lu7\_A pep PGQTFSVLA aff 0.0562 aff\_rescale 0.2384 cle 0.4881 tap -1  
37 ID 6lu7\_A pep YCPRHVICT aff 0.0630 aff\_rescale 0.2677 cle 0.0565 tap -0.  
9 ID 6lu7\_A pep PSGKVEGCM aff 0.0574 aff\_rescale 0.2438 cle 0.1230 tap -0.  
72 ID 6lu7\_A pep NVQLRVIGH aff 0.0606 aff\_rescale 0.2574 cle 0.0333 tap -0.  
257 ID 6lu7\_A pep TGI AVLDMC aff 0.0587 aff\_rescale 0.2492 cle 0.0237 tap -1  
272 ID 6lu7\_A pep LQNGMNGRT aff 0.0633 aff\_rescale 0.2687 cle 0.0269 tap -1  
292 ID 6lu7\_A pep TPFDVVRQC aff 0.0498 aff\_rescale 0.2115 cle 0.2813 tap -1  
88 ID 6lu7\_A pep KLKVDTANP aff 0.0506 aff\_rescale 0.2147 cle 0.0636 tap 0  
85 ID 6lu7\_A pep CVLKLKVDT aff 0.0601 aff\_rescale 0.2551 cle 0.0331 tap -0  
1 ID 6lu7\_A pep SGFRKMAFP aff 0.0549 aff\_rescale 0.2332 cle 0.0275 tap 0.  
36 ID 6lu7\_A pep VYCPRHVIC aff 0.0493 aff\_rescale 0.2092 cle 0.0416 tap 0.  
148 ID 6lu7\_A pep VGFNIDYDC aff 0.0542 aff\_rescale 0.2303 cle 0.0253 tap -0  
202 ID 6lu7\_A pep VNVLAWLYA aff 0.0595 aff\_rescale 0.2528 cle 0.0371 tap -1  
275 ID 6lu7\_A pep GMNGRTILG aff 0.0618 aff\_rescale 0.2623 cle 0.2592 tap -1  
193 ID 6lu7\_A pep AAGTDTTIT aff 0.0617 aff\_rescale 0.2619 cle 0.0276 tap -0.  
284 ID 6lu7\_A pep SALLEDEFT aff 0.0604 aff\_rescale 0.2563 cle 0.0245 tap -0.  
244 ID 6lu7\_A pep QDHVDILGP aff 0.0542 aff\_rescale 0.2300 cle 0.0414 tap -0  
137 ID 6lu7\_A pep KGSFLNGSC aff 0.0536 aff\_rescale 0.2275 cle 0.0300 tap -0  
11 ID 6lu7\_A pep GKVEGCMVQ aff 0.0455 aff\_rescale 0.1932 cle 0.2424 tap -1  
30 ID 6lu7\_A pep LWLDDVVYC aff 0.0488 aff\_rescale 0.2070 cle 0.0253 tap (0  
76 ID 6lu7\_A pep RVIGHSMQN aff 0.0593 aff\_rescale 0.2517 cle 0.0792 tap -0  
152 ID 6lu7\_A pep IDYDCVSFC aff 0.0506 aff\_rescale 0.2147 cle 0.0337 tap 0.  
249 ID 6lu7\_A pep ILGPLSAQT aff 0.0583 aff\_rescale 0.2477 cle 0.1454 tap -0.  
217 ID 6lu7\_A pep RWFLNRFTT aff 0.0522 aff\_rescale 0.2216 cle 0.0781 tap -1  
109 ID 6lu7\_A pep GQTFSVLAC aff 0.0529 aff\_rescale 0.2248 cle 0.0626 tap -0  
8 ID 6lu7\_A pep FPSGKVEGC aff 0.0537 aff\_rescale 0.2278 cle 0.0300 tap -0.  
207 ID 6lu7\_A pep WLYAAVING aff 0.0626 aff\_rescale 0.2658 cle 0.0294 tap -1  
102 ID 6lu7\_A pep KFVRIQPGQ aff 0.0476 aff\_rescale 0.2019 cle 0.0349 tap 0.  
14 ID 6lu7\_A pep EGC MVQVTC aff 0.0548 aff\_rescale 0.2326 cle 0.0285 tap -1  
247 ID 6lu7\_A pep VDILGPLSA aff 0.0533 aff\_rescale 0.2262 cle 0.1825 tap -0.

281 ID 6lu7\_A pep ILGSALLED aff 0.0670 aff\_rescale 0.2843 cle 0.1918 tap -1.  
296 ID 6lu7\_A pep VVRQCSGVT aff 0.0549 aff\_rescale 0.2330 cle 0.0824 tap -0.  
232 ID 6lu7\_A pep LVAMKYNYE aff 0.0647 aff\_rescale 0.2745 cle 0.0261 tap -1.  
184 ID 6lu7\_A pep PFVDRQTAQ aff 0.0425 aff\_rescale 0.1803 cle 0.3517 tap -0.  
103 ID 6lu7\_A pep FVRIQPGQT aff 0.0556 aff\_rescale 0.2359 cle 0.0268 tap -0.  
266 ID 6lu7\_A pep ASLKELLQN aff 0.0626 aff\_rescale 0.2660 cle 0.0272 tap -1.  
280 ID 6lu7\_A pep TILGSALLE aff 0.0645 aff\_rescale 0.2740 cle 0.0276 tap -1.  
248 ID 6lu7\_A pep DILGPLSAQ aff 0.0513 aff\_rescale 0.2180 cle 0.0402 tap -0.  
100 ID 6lu7\_A pep KYKFVRIQP aff 0.0449 aff\_rescale 0.1907 cle 0.0347 tap 0.  
188 ID 6lu7\_A pep RQTAQAAGT aff 0.0554 aff\_rescale 0.2354 cle 0.0255 tap -1.  
127 ID 6lu7\_A pep QCAMRPNFT aff 0.0571 aff\_rescale 0.2424 cle 0.0226 tap -0.  
238 ID 6lu7\_A pep NYEPLTQDH aff 0.0501 aff\_rescale 0.2127 cle 0.1207 tap -0.  
143 ID 6lu7\_A pep GSCGSVGFN aff 0.0636 aff\_rescale 0.2701 cle 0.0229 tap -1.  
155 ID 6lu7\_A pep DCVSFCYMH aff 0.0541 aff\_rescale 0.2297 cle 0.1132 tap -1.  
57 ID 6lu7\_A pep LLIRKSNHN aff 0.0611 aff\_rescale 0.2593 cle 0.1002 tap -1.  
7 ID 6lu7\_A pep AFPSGKVEG aff 0.0551 aff\_rescale 0.2341 cle 0.1583 tap -1.  
91 ID 6lu7\_A pep VDTANPKTP aff 0.0479 aff\_rescale 0.2032 cle 0.0261 tap -0.  
171 ID 6lu7\_A pep VHAGTDLEG aff 0.0610 aff\_rescale 0.2590 cle 0.0517 tap -1.  
182 ID 6lu7\_A pep YGPFVDRQT aff 0.0577 aff\_rescale 0.2452 cle 0.0597 tap -1.  
172 ID 6lu7\_A pep HAGTDLEGN aff 0.0629 aff\_rescale 0.2671 cle 0.0235 tap -1.  
101 ID 6lu7\_A pep YKFVRIQPG aff 0.0577 aff\_rescale 0.2450 cle 0.0599 tap -1.  
135 ID 6lu7\_A pep TIKGSFLNG aff 0.0554 aff\_rescale 0.2354 cle 0.1691 tap -1.  
99 ID 6lu7\_A pep PKYKFVRIQ aff 0.0479 aff\_rescale 0.2032 cle 0.0317 tap -0.  
13 ID 6lu7\_A pep VEGCMVQVT aff 0.0535 aff\_rescale 0.2272 cle 0.0339 tap -0.  
166 ID 6lu7\_A pep ELPTGVHAG aff 0.0588 aff\_rescale 0.2497 cle 0.1160 tap -1.  
26 ID 6lu7\_A pep TLNGLWLDD aff 0.0656 aff\_rescale 0.2784 cle 0.0332 tap -1.  
119 ID 6lu7\_A pep NGSPSGVYQ aff 0.0470 aff\_rescale 0.1996 cle 0.0459 tap -0.  
112 ID 6lu7\_A pep FSVLACYNG aff 0.0582 aff\_rescale 0.2471 cle 0.0366 tap -1.  
87 ID 6lu7\_A pep LKLKVDATAN aff 0.0562 aff\_rescale 0.2385 cle 0.0272 tap -1.  
237 ID 6lu7\_A pep YNYEPLTQD aff 0.0567 aff\_rescale 0.2406 cle 0.1788 tap -1.  
21 ID 6lu7\_A pep TCGTTTLNG aff 0.0599 aff\_rescale 0.2544 cle 0.0236 tap -1.  
56 ID 6lu7\_A pep DLLIRKSNH aff 0.0515 aff\_rescale 0.2187 cle 0.0788 tap -0.  
116 ID 6lu7\_A pep ACYNGSPSG aff 0.0529 aff\_rescale 0.2246 cle 0.0434 tap -0.  
43 ID 6lu7\_A pep ICTSEDMLN aff 0.0564 aff\_rescale 0.2396 cle 0.0232 tap -1.  
216 ID 6lu7\_A pep DRWFLNRFT aff 0.0478 aff\_rescale 0.2031 cle 0.0510 tap -0.  
105 ID 6lu7\_A pep RIQPGQTFS aff 0.0615 aff\_rescale 0.2613 cle 0.0430 tap -1.  
269 ID 6lu7\_A pep KELLQNGMN aff 0.0549 aff\_rescale 0.2333 cle 0.0352 tap -1.  
111 ID 6lu7\_A pep TFSVLACYN aff 0.0546 aff\_rescale 0.2318 cle 0.0248 tap -1.  
267 ID 6lu7\_A pep SLKELLQNG aff 0.0532 aff\_rescale 0.2261 cle 0.0444 tap -1.  
255 ID 6lu7\_A pep AQTGIAVLD aff 0.0570 aff\_rescale 0.2422 cle 0.0684 tap -1.  
206 ID 6lu7\_A pep AWLYAAVIN aff 0.0502 aff\_rescale 0.2132 cle 0.0224 tap -1.  
33 ID 6lu7\_A pep DDVVYCPRH aff 0.0478 aff\_rescale 0.2031 cle 0.1436 tap -1.  
186 ID 6lu7\_A pep VDRQTAQAA aff 0.0481 aff\_rescale 0.2042 cle 0.0681 tap -1.  
73 ID 6lu7\_A pep VQLRVIGHS aff 0.0618 aff\_rescale 0.2623 cle 0.0330 tap -1.

213 ID 6lu7\_A pep INGDRWFLN aff 0.0568 aff\_rescale 0.2413 cle 0.0270 tap -1  
187 ID 6lu7\_A pep DRQTAQAAG aff 0.0552 aff\_rescale 0.2343 cle 0.0473 tap -  
64 ID 6lu7\_A pep HNFLVQAGN aff 0.0537 aff\_rescale 0.2279 cle 0.0265 tap -1  
221 ID 6lu7\_A pep NRFTTTLND aff 0.0547 aff\_rescale 0.2323 cle 0.0319 tap -1  
270 ID 6lu7\_A pep ELLQNGMNG aff 0.0543 aff\_rescale 0.2307 cle 0.0469 tap -  
113 ID 6lu7\_A pep SVLACYNGS aff 0.0627 aff\_rescale 0.2663 cle 0.0227 tap -2  
170 ID 6lu7\_A pep GVHAGTDLE aff 0.0557 aff\_rescale 0.2364 cle 0.0257 tap -  
54 ID 6lu7\_A pep YEDLLIRKS aff 0.0655 aff\_rescale 0.2783 cle 0.0318 tap -2.4  
138 ID 6lu7\_A pep GSFLNGSCG aff 0.0520 aff\_rescale 0.2209 cle 0.0391 tap -1  
48 ID 6lu7\_A pep DMLNPNYED aff 0.0598 aff\_rescale 0.2538 cle 0.0934 tap -2  
158 ID 6lu7\_A pep SFCYMHME aff 0.0516 aff\_rescale 0.2189 cle 0.0230 tap -  
147 ID 6lu7\_A pep SVGFNIDYD aff 0.0576 aff\_rescale 0.2444 cle 0.0281 tap -1  
3 ID 6lu7\_A pep FRKMAFPSG aff 0.0505 aff\_rescale 0.2146 cle 0.0527 tap -1.  
115 ID 6lu7\_A pep LACYNGSPS aff 0.0606 aff\_rescale 0.2574 cle 0.0228 tap -2  
250 ID 6lu7\_A pep LGPLSAQTG aff 0.0537 aff\_rescale 0.2281 cle 0.0595 tap -1  
162 ID 6lu7\_A pep MHHMELPTG aff 0.0511 aff\_rescale 0.2171 cle 0.0284 tap -  
125 ID 6lu7\_A pep VYQCAMRPN aff 0.0471 aff\_rescale 0.1999 cle 0.0244 tap -  
230 ID 6lu7\_A pep FNLVAMKYN aff 0.0543 aff\_rescale 0.2306 cle 0.0248 tap -  
276 ID 6lu7\_A pep MNGRTILGS aff 0.0637 aff\_rescale 0.2703 cle 0.0382 tap -2  
208 ID 6lu7\_A pep LYAAVINGD aff 0.0523 aff\_rescale 0.2220 cle 0.0391 tap -1  
262 ID 6lu7\_A pep LDMCASLKE aff 0.0546 aff\_rescale 0.2319 cle 0.0273 tap -1  
168 ID 6lu7\_A pep PTGVHAGTD aff 0.0623 aff\_rescale 0.2647 cle 0.0340 tap -2  
175 ID 6lu7\_A pep TDLEGNFYG aff 0.0528 aff\_rescale 0.2240 cle 0.0636 tap -1  
141 ID 6lu7\_A pep LNGSCGSVG aff 0.0547 aff\_rescale 0.2322 cle 0.0238 tap -1  
287 ID 6lu7\_A pep LEDEFTPFDF aff 0.0552 aff\_rescale 0.2344 cle 0.0852 tap -2.  
6 ID 6lu7\_A pep MAFPSGKVE aff 0.0476 aff\_rescale 0.2021 cle 0.0253 tap -1.  
40 ID 6lu7\_A pep RHVICTSED aff 0.0506 aff\_rescale 0.2150 cle 0.0535 tap -1.0  
294 ID 6lu7\_A pep FDVVRQCSG aff 0.0534 aff\_rescale 0.2268 cle 0.0473 tap -1  
150 ID 6lu7\_A pep FNIDYDCVS aff 0.0609 aff\_rescale 0.2587 cle 0.0275 tap -2  
220 ID 6lu7\_A pep LNRFTTTLN aff 0.0493 aff\_rescale 0.2095 cle 0.0405 tap -1.  
139 ID 6lu7\_A pep SFLNGSCGS aff 0.0554 aff\_rescale 0.2353 cle 0.0320 tap -2.  
71 ID 6lu7\_A pep GNVQLRVIG aff 0.0483 aff\_rescale 0.2049 cle 0.0258 tap -1.  
15 ID 6lu7\_A pep GCMVQVTCG aff 0.0499 aff\_rescale 0.2118 cle 0.0306 tap -  
145 ID 6lu7\_A pep CGSVGFNID aff 0.0541 aff\_rescale 0.2298 cle 0.0319 tap -2  
63 ID 6lu7\_A pep NHNFLVQAG aff 0.0463 aff\_rescale 0.1964 cle 0.0270 tap -1  
259 ID 6lu7\_A pep IAVLDMCAS aff 0.0548 aff\_rescale 0.2325 cle 0.0246 tap -2  
282 ID 6lu7\_A pep LGSALLEDE aff 0.0507 aff\_rescale 0.2152 cle 0.0228 tap -1  
136 ID 6lu7\_A pep IKGSLNGS aff 0.0557 aff\_rescale 0.2363 cle 0.0375 tap -2.  
38 ID 6lu7\_A pep CPRHVICTS aff 0.0504 aff\_rescale 0.2141 cle 0.2237 tap -2.5  
240 ID 6lu7\_A pep EPLTQDHVD aff 0.0484 aff\_rescale 0.2055 cle 0.1785 tap -2  
84 ID 6lu7\_A pep NCVLKLKVD aff 0.0462 aff\_rescale 0.1962 cle 0.0269 tap -1  
2 ID 6lu7\_A pep GFRKMAFPS aff 0.0512 aff\_rescale 0.2174 cle 0.0246 tap -2.  
39 ID 6lu7\_A pep PRHVICTSE aff 0.0447 aff\_rescale 0.1899 cle 0.0785 tap -1.8  
131 ID 6lu7\_A pep RPNFTIKGS aff 0.0466 aff\_rescale 0.1979 cle 0.1733 tap -2.

55 ID 6lu7\_A pep EDLLIRKSN aff 0.0455 aff\_rescale 0.1930 cle 0.0250 tap -1.8  
47 ID 6lu7\_A pep EDMLNPNYE aff 0.0456 aff\_rescale 0.1935 cle 0.0259 tap -1  
179 ID 6lu7\_A pep GNFYGPFDVD aff 0.0437 aff\_rescale 0.1856 cle 0.0480 tap -2  
293 ID 6lu7\_A pep PFDVVRQCS aff 0.0460 aff\_rescale 0.1952 cle 0.0282 tap -2

-----

Number of MHC ligands 8 identified. Number of peptides 298. Protein name 6lu7\_A



| Rescale Binding Affinity | C-terminal Cleavage Affinity | TAP transport efficiency |
|--------------------------|------------------------------|--------------------------|
| 3.3669                   | 0.6229                       | 2.702                    |
| 2.6559                   | 0.8852                       | 2.957                    |
| 1.3211                   | 0.9565                       | 2.857                    |
| 1.1146                   | 0.9725                       | 2.998                    |
| 0.8905                   | 0.9722                       | 2.706                    |
| 0.7118                   | 0.9755                       | 2.723                    |
| 0.6489                   | 0.8406                       | 2.676                    |
| 0.4807                   | 0.9503                       | 2.568                    |

2.7020 COMB 3.5954 <-E  
 2.9570 COMB 2.9365 <-E  
 2.8570 COMB 1.6075 <-E  
 2.9980 COMB 1.4104 <-E  
 2.7060 COMB 1.1717 <-E  
 2.7230 COMB 0.9942 <-E  
 2.6760 COMB 0.9088 <-E  
 2.5680 COMB 0.7517 <-E  
 3.5240 COMB 0.7377  
 2.9540 COMB 0.7345  
 2.5820 COMB 0.6969  
 3.02870 COMB 0.6905  
 2.6410 COMB 0.6525  
 2.2310 COMB 0.6311  
 2.8460 COMB 0.6237  
 2.3000 COMB 0.6223  
 2.0740 COMB 0.6016  
 2.05120 COMB 0.5912  
 2.5380 COMB 0.5794  
 2.8230 COMB 0.5711  
 2.7600 COMB 0.5660  
 2.7290 COMB 0.5658  
 3.0780 COMB 0.5636  
 2.08130 COMB 0.5361  
 2.4190 COMB 0.5331  
 2.2160 COMB 0.5268  
 2.4610 COMB 0.5228  
 2.8180 COMB 0.5219  
 2.04490 COMB 0.5048  
 2.1170 COMB 0.5015

.0760 COMB 0.4960  
7670 COMB 0.4929  
5910 COMB 0.4921  
1.7880 COMB 0.4906  
.6920 COMB 0.4887  
.12640 COMB 0.4860  
.3360 COMB 0.4792  
.6130 COMB 0.4783  
.19600 COMB 0.4709  
1.3490 COMB 0.4693  
1.5820 COMB 0.4648  
0510 COMB 0.4638  
.0470 COMB 0.4615  
.16210 COMB 0.4605  
0.6720 COMB 0.4598  
.7710 COMB 0.4595  
1.2640 COMB 0.4578  
.0440 COMB 0.4564  
.5620 COMB 0.4554  
2.2380 COMB 0.4519  
.1010 COMB 0.4499  
4190 COMB 0.4494  
.8460 COMB 0.4477  
.4100 COMB 0.4435  
7640 COMB 0.4422  
.7720 COMB 0.4386  
.1990 COMB 0.4337  
5300 COMB 0.4314  
2.6460 COMB 0.4307  
0.3860 COMB 0.4300  
1.2850 COMB 0.4283  
3.0400 COMB 0.4271  
.8100 COMB 0.4262  
3100 COMB 0.4209  
0.5540 COMB 0.4184  
1.2650 COMB 0.4179  
1.460 COMB 0.4154  
.7710 COMB 0.4145  
.2730 COMB 0.4103  
2300 COMB 0.4095  
.1910 COMB 0.4056  
7830 COMB 0.4053  
.6480 COMB 0.4037  
1.7410 COMB 0.4036

0870 COMB 0.4034  
4330 COMB 0.4033  
.2050 COMB 0.4031  
0.3320 COMB 0.4001  
.5090 COMB 0.3997  
0.0310 COMB 0.3987  
1.1210 COMB 0.3904  
6750 COMB 0.3855  
0.9660 COMB 0.3843  
0.9780 COMB 0.3832  
0.8170 COMB 0.3810  
1310 COMB 0.3797  
0.7880 COMB 0.3794  
5530 COMB 0.3718  
1.3090 COMB 0.3710  
0.9000 COMB 0.3689  
1.0880 COMB 0.3675  
4770 COMB 0.3648  
1.6870 COMB 0.3629  
0.1100 COMB 0.3616  
8270 COMB 0.3607  
.1290 COMB 0.3592  
3080 COMB 0.3583  
0.1920 COMB 0.3580  
1170 COMB 0.3544  
.0800 COMB 0.3534  
5130 COMB 0.3521  
1.1070 COMB 0.3514  
0.2570 COMB 0.3502  
0.6000 COMB 0.3495  
0.6290 COMB 0.3485  
.0030 COMB 0.3482  
0.3530 COMB 0.3475  
0.5810 COMB 0.3463  
0.5980 COMB 0.3456  
0.3540 COMB 0.3449  
0.3320 COMB 0.3413  
0.0100 COMB 0.3404  
.0800 COMB 0.3372  
0.2200 COMB 0.3334  
0.2680 COMB 0.3320  
0.0620 COMB 0.3314  
0.5140 COMB 0.3307  
0.5880 COMB 0.3302

.800 COMB 0.3301  
6210 COMB 0.3297  
0.5810 COMB 0.3260  
0.5470 COMB 0.3229  
.6970 COMB 0.3186  
.4510 COMB 0.3162  
1.6750 COMB 0.3126  
7180 COMB 0.3120  
0.2440 COMB 0.3118  
0.8210 COMB 0.3092  
.3150 COMB 0.3084  
0.1530 COMB 0.3073  
4150 COMB 0.3071  
.9490 COMB 0.2985  
2220 COMB 0.2980  
2210 COMB 0.2965  
0.4040 COMB 0.2952  
0.9590 COMB 0.2940  
0.5040 COMB 0.2933  
0.0460 COMB 0.2907  
0.2700 COMB 0.2902  
.1340 COMB 0.2893  
1.2040 COMB 0.2820  
0.0380 COMB 0.2818  
0.0760 COMB 0.2812  
0.0130 COMB 0.2806  
0300 COMB 0.2751  
3400 COMB 0.2745  
.4470 COMB 0.2730  
0.3050 COMB 0.2729  
.0110 COMB 0.2718  
1.2090 COMB 0.2708  
-0.2950 COMB 0.2699  
0.4630 COMB 0.2691  
0.0020 COMB 0.2685  
.2930 COMB 0.2660  
0.5590 COMB 0.2649  
0.1510 COMB 0.2615  
.8300 COMB 0.2594  
.1480 COMB 0.2562  
0.3260 COMB 0.2560  
0.2080 COMB 0.2550  
0.2560 COMB 0.2528  
0.5770 COMB 0.2516

0.4150 COMB 0.2513  
2690 COMB 0.2506  
.4690 COMB 0.2498  
0.4590 COMB 0.2495  
0.2680 COMB 0.2483  
.2800 COMB 0.2476  
.6800 COMB 0.2470  
.5590 COMB 0.2470  
0.0420 COMB 0.2469  
0.2880 COMB 0.2469  
.1740 COMB 0.2463  
0.2020 COMB 0.2461  
.4540 COMB 0.2453  
0.7550 COMB 0.2445  
.3630 COMB 0.2435  
6730 COMB 0.2425  
.4030 COMB 0.2421  
.4220 COMB 0.2413  
.2530 COMB 0.2401  
-0.6720 COMB 0.2391  
0.3040 COMB 0.2385  
.2770 COMB 0.2381  
0.4490 COMB 0.2376  
0010 COMB 0.2374  
3970 COMB 0.2353  
0.0240 COMB 0.2329  
-0.5380 COMB 0.2315  
0.4060 COMB 0.2309  
.7210 COMB 0.2300  
6120 COMB 0.2294  
0.1500 COMB 0.2287  
0.1400 COMB 0.2250  
0.1030 COMB 0.2245  
0.2530 COMB 0.2235  
0.8160 COMB 0.2228  
0580 COMB 0.2227  
9650 COMB 0.2212  
0.2420 COMB 0.2212  
0.2700 COMB 0.2207  
2350 COMB 0.2206  
1.0620 COMB 0.2171  
.1950 COMB 0.2169  
0.4000 COMB 0.2169  
7350 COMB 0.2168

9260 COMB 0.2167  
0.5950 COMB 0.2156  
-1.2650 COMB 0.2152  
.3700 COMB 0.2146  
.5120 COMB 0.2143  
.1200 COMB 0.2140  
3080 COMB 0.2127  
2280 COMB 0.2126  
.3290 COMB 0.2123  
0.5610 COMB 0.2111  
0.7070 COMB 0.2104  
.4300 COMB 0.2093  
1.3040 COMB 0.2084  
0.8050 COMB 0.2065  
3620 COMB 0.2062  
0630 COMB 0.2047  
.0760 COMB 0.2033  
1.3390 COMB 0.1998  
1.1120 COMB 0.1985  
1.4700 COMB 0.1971  
.1530 COMB 0.1963  
3950 COMB 0.1910  
3390 COMB 0.1910  
0.8410 COMB 0.1902  
1.5590 COMB 0.1891  
1.9010 COMB 0.1883  
.3910 COMB 0.1870  
1.3620 COMB 0.1845  
.1970 COMB 0.1827  
1.7000 COMB 0.1824  
.5120 COMB 0.1823  
9810 COMB 0.1815  
.9960 COMB 0.1813  
2610 COMB 0.1801  
.6730 COMB 0.1771  
8580 COMB 0.1748  
1.2780 COMB 0.1747  
.2220 COMB 0.1744  
.1710 COMB 0.1742  
.5780 COMB 0.1736  
0.8590 COMB 0.1736  
1.0330 COMB 0.1730  
0.8370 COMB 0.1726  
9490 COMB 0.1698

1.5610 COMB 0.1673  
1.4900 COMB 0.1669  
1.3060 COMB 0.1666  
1.4120 COMB 0.1665  
1.4610 COMB 0.1647  
2.1410 COMB 0.1627  
1.5660 COMB 0.1619  
1.360 COMB 0.1613  
1.3210 COMB 0.1608  
2.1590 COMB 0.1599  
1.2890 COMB 0.1579  
1.8170 COMB 0.1578  
3160 COMB 0.1567  
1.1330 COMB 0.1541  
1.6640 COMB 0.1539  
1.3630 COMB 0.1532  
-1.0510 COMB 0.1510  
-1.6840 COMB 0.1501  
1.5440 COMB 0.1488  
1.5860 COMB 0.1486  
1.7570 COMB 0.1482  
2.4320 COMB 0.1482  
1.7360 COMB 0.1468  
1.8120 COMB 0.1451  
0750 COMB 0.1435  
2530 COMB 0.1433  
5310 COMB 0.1415  
1.8650 COMB 0.1406  
1.4540 COMB 0.1401  
1.5200 COMB 0.1395  
1.0370 COMB 0.1382  
1.4950 COMB 0.1340  
1.6560 COMB 0.1336  
1.0730 COMB 0.1309  
1.3910 COMB 0.1309  
2.1220 COMB 0.1301  
1.8230 COMB 0.1275  
3260 COMB 0.1257  
5940 COMB 0.1180  
2.3580 COMB 0.1144  
1.7290 COMB 0.1138  
1540 COMB 0.1134  
3160 COMB 0.1109  
3640 COMB 0.1057

3610 COMB 0.1037  
1.9580 COMB 0.0995  
2.2020 COMB 0.0827  
1.7240 COMB 0.0632



| <b>Prediction score</b> |
|-------------------------|
| 3.5954                  |
| 2.9365                  |
| 1.6075                  |
| 1.4104                  |
| 1.1717                  |
| 0.9942                  |
| 0.9088                  |
| 0.7517                  |
