# Supplementary material for: Immunoinformatics and Molecular Docking Studies Predicted Potential Multiepitope‐Based Peptide Vaccine and Novel Compounds against Novel SARS‐CoV‐2 through Virtual Screening
Source: Hindawi journal article supplement (doi:10.1155/2021/1596834), 2021-01-01
Supplement: f3 [file 1596834.f3.pdf]

| <b>Proteins</b> | <b>Molecular weight</b> | <b>Theorecical PI</b> | <b>Instability index</b> |
|-----------------|-------------------------|-----------------------|--------------------------|
| Non-strutural   | 33796.64                | 5.95                  | 2.65                     |

| <b>Half-life</b>                               | <b>Stability profile</b> |
|------------------------------------------------|--------------------------|
| 1.9 hours (mammalian reticulocytes, in vitro). | stable                   |
| >20 hours (yeast, in vivo).                    |                          |
| >10 hours (Escherichia coli, in vivo).         |                          |
